# Supplementary material for: Metastrongyloid Infection with Aelurostrongylus abstrusus, Troglostrongylus brevior, Oslerus rostratus and Angiostrongylus chabaudi in Feral Cats from the Canary Islands (Spain)
Source: MDPI journal article supplement (doi:10.3390/ani13132168), 2023-06-30
Supplement: s1 [file s1]

**Table S1.** Detailed information related to the specimens of *Felis catus* captured in La Gomera (Canary Islands, Spain) analysed in this study and the results obtained.

| ANIMAL CODE | SEX    | MUNICIPALITY               | DATE OF CAPTURE | LUNGWORM DETECTION |
|-------------|--------|----------------------------|-----------------|--------------------|
| 22021603    | Male   | Vallehermoso               | June 2021       | <b>Positive</b>    |
| 22021604    | Female | Vallehermoso               | Unknown         | Negative           |
| 22021605    | Male   | Vallehermoso               | June 2021       | Negative           |
| 22021606    | Male   | Vallehermoso               | June 2021       | Negative           |
| 22021607    | Hembra | Vallehermoso               | May 2021        | <b>Positive</b>    |
| 22021608    | Male   | Vallehermoso               | May 2021        | Negative           |
| 22022201    | female | Vallehermoso               | May /2021       | Negative           |
| 22022202    | Male   | Vallehermoso               | May 2021        | <b>Positive</b>    |
| 22022203    | Female | Vallehermoso               | August 2021     | Negative           |
| 22022204    | Male   | Vallehermoso               | May 2021        | <b>Positive</b>    |
| 22033101    | Male   | Hermigua                   | October 2021    | <b>Positive</b>    |
| 22033102    | Female | Vallehermoso               | November 2021   | <b>Positive</b>    |
| 22033103    | Male   | Valle Gran Rey             | November 2021   | <b>Positive</b>    |
| 22033104    | Male   | Valle Gran Rey             | November 2021   | <b>Positive</b>    |
| 22033105    | Male   | Valle Gran Rey             | December 2021   | Negative           |
| 22090601    | Male   | Vallehermoso               | July 2022       | <b>Positive</b>    |
| 22090602    | Male   | Vallehermoso               | July 2022       | <b>Positive</b>    |
| 22090603    | female | Valle Gran Rey             | July 2022       | <b>Positive</b>    |
| 22090701    | Male   | San Sebastián de La Gomera | July 2022       | Negative           |
| 22090702    | Male   | Alajeró                    | July 2022       | <b>Positive</b>    |
| 22090703    | Female | Hermigua                   | July 2022       | <b>Positive</b>    |
| 22090801    | Male   | Hermigua                   | July 2022       | Negative           |
| 22090901    | Female | Vallehermoso               | July 2022       | Negative           |
| 22090902    | Male   | Vallehermoso               | July 2022       | Negative           |
| 22090903    | Male   | Agulo                      | July 2022       | <b>Positive</b>    |
| 22090904    | Female | Vallehermoso               | July 2022       | Negative           |
| 22090905    | Male   | Agulo                      | July 2022       | <b>Positive</b>    |
| 22090906    | Female | Valle Gran Rey             | June 2022       | <b>Positive</b>    |
| 22090907    | Male   | ValleGran Rey              | June 2022       | Negative           |
